# Supplementary material
Source: PubMed Central journal article supplement (PMC2838924)
Supplement: NIHMS180268-supplement-Supplementary.pdf [file NIHMS180268-supplement-Supplementary.pdf]

Supporting Information: A nanoelectronic-enzyme linked immunosorbent assay  
(ne-ELISA) for detection of proteins in physiological solutions

Eric Stern<sup>\*</sup>, Aleksandar Vacic<sup>\*</sup>, Chao Li, Fumiaki N. Ishikawa, Chongwu Zhou, Mark A. Reed,  
and Tarek M. Fahmy

**Sensing Calculation.** In order to calculate the number of urease molecules present in the sensing reservoir, we began by determining the increase in  $[H^+]$ . For the 1.6 pg/mL IL-2 sample, the pH increased by 0.05 units, corresponding to  $\sim 1.1 \times 10^{-9}$  M, or  $\sim 4.3 \times 10^{-15}$  mol in the 4  $\mu$ L reservoir. This pH change is solely due to the urease (Fig. S2), thus, using the unit definition of urease obtained from the manufacturer, this corresponds to  $\sim 6.7 \times 10^{-11}$  mg urease. Converting to mols (480 kDa) yields  $\sim 1.4 \times 10^{-19}$  mol or  $\sim 8.4 \times 10^4$  molecules. Accounting for a  $\sim 100$  nm<sup>2</sup> antibody hydrodynamic footprint, a maximum of  $\sim 10^9$  IL-2 molecules can bind the (gold) lead surface area ( $\sim 10^5$   $\mu$ m<sup>2</sup>) in the 4  $\mu$ L reservoir, thus a maximum of  $\sim 10^9$  IL-2 molecules (or  $\sim 1.7 \times 10^{-15}$  mol) can be bound. The reservoir solution volume is 4  $\mu$ L, but only a small percentage of the IL-2 molecules in the reservoir will be exposed to the surface and, thus, able to bind.

**Sensitivity Calculations.** The change in pH plotted in Fig. 9 was calculated by first determining

the normalized  $\Delta I_{DS}/\text{pH}$  unit  $\left( \frac{\Delta I_{DS}}{\text{pH unit}} = g_m(\text{wet}) \cdot m + b \right)$ , where  $m$  and  $b$  are the slope and

intercept, respectively, of the trendline from Fig. 7. The observed change in channel current ( $I_{DS}$ ) was then divided by this value to obtain the calculated change in pH.

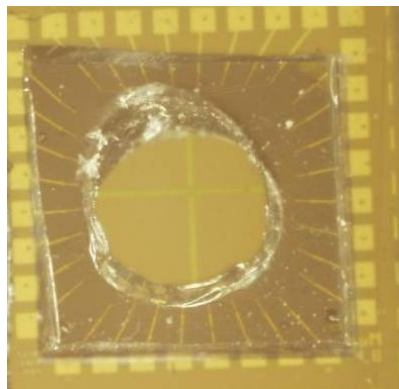

**Supplementary Fig. S1.** Optical micrograph of a single die with a reservoir defined by a PDMS gasket. Contact pads on the die edges fan into parallel Ni/Au leads, which contain nanowire devices such as that shown in Fig. 2.

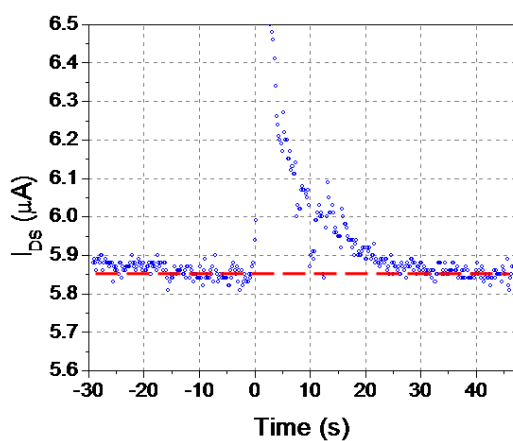

**Supplementary Fig. S2.** Response [ $I_{DS}(time)$ ] of a sensor configured for IL-2 detection with no IL-2 added during the protein-binding step (Fig. 1Biii). At  $time = 0$  the 100 mM urea solution

was added to the pH 8.0 buffer. The dashed red line shows the initial current level. For this device,  $\Delta I_{pH} = 1.8$  nA.

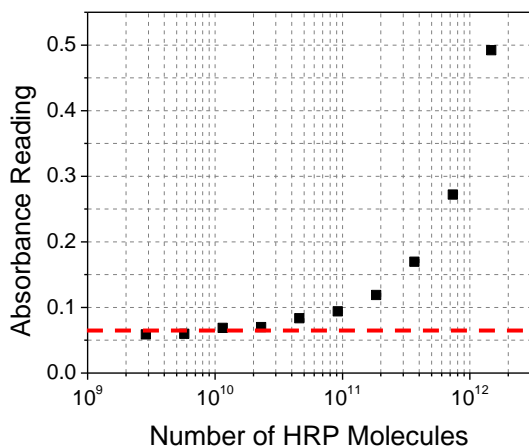

**Supplementary Fig. S3.** Plot of the absorbance reading ( $\lambda = 450$ ) vs. streptavidin-HRP concentration after a 15 min reaction with TMB as the substrate. The red dashed line shows the average reading for 12 control wells to which no enzyme was added (OD = 0.0611).
